# Supplementary material
Source: PubMed Central journal article supplement (PMC8102884)
Supplement: NIHMS1047067-supplement-Appendix_table.pdf [file NIHMS1047067-supplement-Appendix_table.pdf]

**Table S1.** Odds ratios (point estimates and 95% CIs) of hypertension using different definitions associated with an interquartile range increase (41.7  $\mu\text{g}/\text{m}^3$ ) in  $\text{PM}_{2.5}$  in the fully-adjusted model.

| Definitions                | Hypertension prevalence | OR (95%CI)       |
|----------------------------|-------------------------|------------------|
| Main                       | 40.9%                   | 1.11 (1.05,1.17) |
| Self-reported hypertension | 24.3%                   | 1.12 (1.05,1.18) |
| Diagnostic hypertension    | 30.8%                   | 1.06 (1.01,1.12) |

Abbreviations: SBP, systolic blood pressure; DBP, diastolic blood pressure; OR, odds ratio; CI, confidence interval;  $\text{PM}_{2.5}$ , particulate matter with an aerodynamic diameter less than or equal to 2.5  $\mu\text{m}$ .

Definitions of hypertension: Main, self-reported hypertension or  $\text{SBP} \geq 140\text{mmHg}$  or  $\text{DBP} \geq 90\text{mmHg}$ ; Diagnostic hypertension  $\text{SBP} \geq 140\text{mmHg}$  or  $\text{DBP} \geq 90\text{mmHg}$ .
